# Supplementary material for: Transcriptome and Molecular Endocrinology Aspects of Epicardial Adipose Tissue in Cardiovascular Diseases: A Systematic Review and Meta-Analysis of Observational Studies
Source: Biomed Res Int. 2015 Nov 9;2015:926567. doi: 10.1155/2015/926567 (PMC4655271; doi:10.1155/2015/926567)
Supplement: Supplementary file 1 — Additional information about methods; study inclusion criteria, data extraction form (including description of specific genes, case definition and diagnosis, and differentially expressed Genes), and study quality assessment form (PRIMARK assessment tool) was described in Appendix S1. Characteristics of all studies included in the systematic review were listed in S1 Table. Differentially expressed genes in epicardial adipose tissue (EAT) of patients with cardiovascular diseases (CVDs) and/or cardiometabolic risk factors were listed S2 Table. [file 926567.f1.zip]

Archive with 3 entries (3 files):
- appendix 1.docx
- S1 Table.docx
- S2 Table.docx
